1 Warming temperatures could expose more than 1.3 billion new people to Zika virus risk by 2050

2

3 Sadie J. Ryan<sup>1,2,3\*†</sup>, Colin J. Carlson<sup>4\*</sup>, Blanka Tesla<sup>5,6</sup>, Matthew H. Bonds<sup>7</sup>, Calistus N.

4 Ngonghala<sup>2,8</sup>, Erin A. Mordecai<sup>9</sup>, Leah R. Johnson<sup>10,11</sup>, Courtney C. Murdock<sup>5,6,12,13,14,15,16</sup>

5

6 **Affiliations:**

7 <sup>1</sup> Department of Geography, University of Florida, Gainesville, Florida, United States of

8 America

9 <sup>2</sup> Emerging Pathogens Institute, University of Florida, Gainesville, Florida, United States of

10 America

11 <sup>3</sup> School of Life Sciences, University of KwaZulu-Natal, Durban, South Africa

12 <sup>4</sup> Department of Biology, Georgetown University, Washington, DC 2007, U.S.A.

13 <sup>5</sup> Department of Infectious Diseases, College of Veterinary Medicine, University of Georgia,

14 Athens, GA 30602, USA

15 <sup>6</sup> Center for Tropical and Emerging Global Diseases, University of Georgia, Athens, Georgia,

16 United States of America

17 <sup>7</sup> Department of Global Health and Social Medicine, Harvard Medical School, Boston, MA

18 02115 USA

19 <sup>8</sup> Department of Mathematics, University of Florida, Gainesville, FL 32611, USA

20 <sup>9</sup> Biology Department, Stanford University, Stanford, California, 94305, United States of

21 America

22 <sup>10</sup> Department of Statistics, Virginia Polytechnic Institute and State University, Blacksburg,

23 Virginia, 24061, USA

24 <sup>11</sup> Computational Modeling and Data Analytics, Virginia Polytechnic Institute and State  
25 University, Blacksburg, Virginia, 24061, USA

26 <sup>12</sup> Odum School of Ecology, University of Georgia, Athens GA 30602, USA

27 <sup>13</sup> Center for the Ecology of Infectious Diseases, University of Georgia, Athens GA 30602, USA

28 <sup>14</sup> Center for Vaccines and Immunology, College of Veterinary Medicine, University of Georgia,  
29 Athens, GA 30602, USA

30 <sup>15</sup> Riverbasin Center, University of Georgia, Athens GA 30602, USA

31 <sup>16</sup>Department of Entomology, College of Agriculture and Life Sciences, Cornell University,  
32 Ithaca, NY 14853, USA

33

34 \* These authors contributed equally.

35 † **Corresponding author:** [sjryan@ufl.edu](mailto:sjryan@ufl.edu)

36

37

38

39 **Abstract**

40 In the aftermath of the 2015 pandemic of Zika virus, concerns over links between climate change  
41 and emerging arboviruses have become more pressing. Given the potential that much of the  
42 world might remain at risk from the virus, we use a model of thermal bounds on Zika virus  
43 (ZIKV) transmission to project climate change impacts on transmission suitability risk by mid-  
44 century (a generation into the future). In the worst-case scenario, over 1.3 billion new people  
45 could face suitable transmission temperatures for ZIKV by 2050. Given these suitability risk  
46 projections, we suggest an increased priority on research establishing the immune history of  
47 vulnerable populations, modeling when and where the next ZIKV outbreak might occur,  
48 evaluating the efficacy of conventional and novel intervention measures, and increasing  
49 surveillance efforts to prevent further expansion of ZIKV.

50

51 **Author Summary**

52 First discovered in Uganda in the 1950s, Zika virus (ZIKV) is a new threat to global health  
53 security. The virus is spread primarily by female *Aedes* mosquitoes, with occasional sexual  
54 transmission in humans, and can cause Zika congenital syndrome (which includes fetal  
55 abnormalities like microcephaly) when women are infected during pregnancy. Our study is the  
56 first to quantify how many people may be exposed to temperatures suitable for ZIKV  
57 transmission in a changing climate. In the worst-case scenario, by 2050, climate change could  
58 expose more than 1.3 billion people worldwide to temperatures suitable for transmission - for the  
59 first time. The next generation will face substantially increased ZIKV transmission temperature  
60 suitability in North America and Europe, where naïve populations might be particularly  
61 vulnerable. Mitigating climate change even to moderate emissions scenarios could significantly

- 62 reduce global expansion of climates suitable for ZIKV transmission, potentially protecting  
63 around 200 million people.

## 64 **Introduction**

65 In the past two decades, several emerging arboviruses have undergone continental or global  
66 range expansions. Often, these viruses only become major research targets after sizable  
67 outbreaks in the Western hemisphere, like the 1999-2002 West Nile virus outbreak in the United  
68 States and Canada [1], the 2013-2015 chikungunya outbreak in the Americas, and, most recently,  
69 the 2015-2017 epidemic of Zika virus (ZIKV) in the Americas. Although these outbreaks often  
70 take public health communities by surprise [1, 2], their international spread occurred gradually  
71 with limited global concern and little action before a major outbreak occurred [4]. In the  
72 aftermath of the Zika pandemic, developing tools that can successfully anticipate the climate  
73 conditions that promote these sorts of explosive arbovirus outbreaks is a critical research need [4,  
74 5].

75 ZIKV continues to pose a looming threat. Since 2013, the virus spread to at least 49  
76 countries and territories [7], resulting in an estimated 150,000 to 500,000 cases with at least  
77 3,000 cases of microcephaly in Brazil alone [3]. While other emerging and re-emerging viruses  
78 have much higher case-fatality rates [8], such as yellow fever virus or Eastern equine  
79 encephalitis virus, the social and human costs of microcephaly are profound [9]. In the aftermath  
80 of the epidemic in the Americas [6, 9], concern remains about potential future outbreaks of the  
81 virus and its ongoing relevance as a public health threat. In Latin America and the Caribbean,  
82 high seroprevalence rates would suggest that another major outbreak is unlikely in the short term  
83 [11, 12]. In contrast, ZIKV remains a potential threat at its range margins in the Americas  
84 (especially in the southern United States) [13, 14], Africa, and Asia [15–17]. Although the virus  
85 has spread through Africa and Asia for several decades without an outbreak on the scale of the  
86 one in the Americas, the seroprevalence of Zika in its native range is poorly characterized.

87 Further, the evolution of novel ZIKV strains may make the threat newly relevant in Africa and  
88 Asia [18]: local transmission of ZIKV in Angola in 2017 underscores the potential for this  
89 problem to occur again [19].

90 The relationship between climate change and ZIKV adds an additional layer of  
91 complexity. The contribution of climate change to the severity of the 2015 outbreak is difficult to  
92 ascertain definitively, and some have suggested links between Zika transmission and El Niño  
93 [20]. Previous models have suggested that *Aedes*-borne virus transmission should expand  
94 significantly in a changing climate, especially those transmitted by *Aedes aegypti* [21]. Limited  
95 modeling work done during the 2016 outbreak suggested that Zika transmission might be  
96 constrained to slightly warmer, less seasonally variable parts of the world than dengue [22]; and  
97 recent work by Tesla *et al.* combining experimental and modeling approaches has suggested that  
98 the minimum temperature for ZIKV transmission by *Aedes aegypti* is roughly 5°C higher than  
99 that of dengue virus [23]. Thus, while the current range of Zika transmission is confined to the  
100 tropics, climate change could increase the number of people exposed for the first time to  
101 temperatures suitable for Zika transmission.

102 Here, we provide the first systematic assessment of where future temperatures are  
103 expected to become suitable for transmission, and could most substantially increase the  
104 distribution of ZIKV and its risk to human populations. To achieve this, we follow a similar  
105 approach described in our previous studies that have used a temperature-dependent transmission  
106 model to assess environmental suitability for dengue transmission [24]. In this study, we project  
107 the Zika-specific model [23] onto current temperatures and evaluate the population at risk based  
108 on human population density data from 2015, during the Zika pandemic. We then project the  
109 temperature-dependent Zika model forward with climate change to the year 2050 (approximately

110 one human generation into the future) and evaluate where human populations might be expected  
111 to face their first exposure to temperatures suitable for ZIKV transmission.

112

## 113 **Methods**

### 114 **Mechanistic Model of Temperature Suitability for ZIKV Transmission**

115 We used a recently published experimentally-derived mechanistic model of ZIKV transmission  
116 by *Ae. aegypti* to map temperature-driven transmission risk [23]. In brief, the approach is to use a  
117 Bayesian framework to fit thermal responses for mosquito and virus traits that drive transmission  
118 that were empirically estimated in laboratory experiments, and then combine them to obtain the  
119 posterior distribution of  $R_0$  as a function of temperature. The full methods are described in detail  
120 in Johnson *et al.* [25] and several of the particular traits and fits for *Ae. aegypti* are originally  
121 presented in Mordecai *et al.* [26]. The more recent Tesla *et al.* description of thermal responses  
122 included data and fitted thermal performance curves for daily adult mosquito mortality as well as  
123 two ZIKV specific traits: vector competence and the extrinsic incubation rate [23]. The posterior  
124 samples for  $R_0$  as a function of temperature (rescaled to range from zero to one, given that the  
125 absolute magnitude of  $R_0$  in any given setting varies) were generated, and the probability that  $R_0$   
126  $> 0$  at each temperature was obtained, a cutoff inclusive of any transmission risk (not just  
127 sustained outbreaks, where  $R_0 > 1$ ). We used the thermal boundaries for which ZIKV  $R_0 > 0$  with  
128 a posterior probability  $> 0.975$  to define the limits on suitability for transmission for monthly  
129 temperatures, then calculated climate model data layers as described below. This high probability  
130 allows us to define a temperature range for potential transmission that is conservative. The final  
131 interval of “suitable transmission temperatures” was given as 23.9-34.0°C.

### 132 **Climate & Population Data**

133 To examine the impact of climate change on transmission risk, we follow the approach of Ryan  
134 *et al.* [24]. Briefly, we obtained 5 minute resolution current mean monthly temperature data from  
135 the WorldClim dataset ([www.worldclim.org](http://www.worldclim.org)) [27]. We then selected four general circulation  
136 models (GCMs) and two representative concentration pathways (RCPs 4.5, 8.5) to account for  
137 different global responses to mitigate climate change. The GCMs are the Beijing Climate Center  
138 Climate System Model (BCC-CSM1.1); the Hadley GCM (HadGEM2-AO and HadGEM2-ES);  
139 and the National Center for Atmospheric Research's Community Climate System Model  
140 (CCSM4). Future scenario climate model output data were acquired from the research program  
141 on Climate Change, Agriculture, and Food Security (CCAFS) web portal ([http://ccafs-](http://ccafs-climate.org/data_spatial_downscaling/)  
142 [climate.org/data\\_spatial\\_downscaling/](http://ccafs-climate.org/data_spatial_downscaling/)), part of the Consultative Group for International  
143 Agricultural Research (CGIAR). We used model outputs created using the delta downscaling  
144 method, from the IPCC AR5. For visualizations, we used the HadGEM2-ES model, the most  
145 commonly used GCM. The mechanistic transmission model was then projected onto the climate  
146 data using the 'raster' package in R 3.1.1 ('raster' [28]).

147 To quantify the population at risk (PAR), we diverged from the previous approach, and  
148 aimed to not just capture projected population growth, but to incorporate influences of predicted  
149 economic and social changes during the next half century. Therefore, we updated the methods in  
150 Ryan *et al.* [21] to incorporate population projection products that contain the Shared  
151 Socioeconomic Pathways (SSPs) [29]. The SSPs are five alternative population trajectory  
152 outcomes based on development, economic, education, and urbanization trends, specifically  
153 tailored to responses to climate change and/or mitigation strategies. The different SSPs (1-5)  
154 describe trajectories in which components such as fertility and urban growth are impacted by  
155 differences in regional and national equality, conflict, efforts for sustainability, or driven by



156 fossil fuels. Different combinations of SSPs and RCPs can be paired based on plausibility, but  
157 this introduces factorial combinations and makes coherent projections about future disease risk  
158 more complex, so we reserve exploration of this axis of demographic complexity for future  
159 studies. For this study, we selected the SSP2 scenario—a middle of the road scenario—to reflect  
160 expected growth and population geography shifts due to processes such as migration and  
161 urbanization. We acknowledge that SSP2 and RCP 8.5 are an unlikely combined future scenario  
162 [30,31], but present this as the extreme of our projected continuum. The population product we  
163 use here is projected from a baseline population, the Gridded Population of the World (GPW)  
164 [32], including the Global Rural-Urban Mapping Project (GRUMP) [33]. We therefore chose a  
165 baseline population for 2015 from GPW products, to reflect conditions during the recent Zika  
166 outbreak, and selected the SSP2 2050 population projection product [30], available from  
167 ([http://sedac.ciesin.columbia.edu/data/set/popdynamics-pop-projection-ssp-2010-2100/data-](http://sedac.ciesin.columbia.edu/data/set/popdynamics-pop-projection-ssp-2010-2100/data-download)  
168 [download](#)). We aggregated all geographic layers in our analyses to a 0.25° grid cell to be  
169 consistent.

## 170 **Current and Future Transmission Risk**

171 To examine the impact of climate change on transmission risk, we follow the approach of Ryan  
172 *et al.* [21]. This previous work used existing *Aedes* transmission models (which are mostly  
173 appropriate for dengue) [26] to project climate change impacts, by mapping areas where mean  
174 temperatures fall within the 97.5% posterior probability, or 95% credibility interval for  
175 suitability predicted by the Bayesian model. These maps can be projected onto different climate  
176 futures (different general circulation models and representative concentration pathways; GCMs  
177 and RCPs, respectively), and populations at risk can be compared between current and future  
178 maps. Following this protocol, we overlay suitability maps and population grids for 2015 and

179 2050 (with different climate pathways for the latter) and calculate global population at risk. For  
180 each analysis, we also stratify these estimates with a regional breakdown using the definitions of  
181 the Global Burden of Disease (GBD) study regions to align with policy and planning goals [34].

182

## 183 **Results**

184 At present, most of the predicted transmission risk for ZIKV occurs in the tropics (**Figure 1**).  
185 Using the Tesla *et al.* [23] thermal boundary projection map, we find a “population at risk”  
186 (PAR) for 2015 of ~5 billion (here referring to any population inside pixels evaluated as  
187 thermally suitable for at least one month of the year – **Table 1**). It is important to note that this  
188 thermal boundary does not distinguish whether or not *Aedes aegypti* or ZIKV are currently  
189 present in a region. Outside Latin America and the Caribbean (LAC), we find a population at risk  
190 of 4.69 billion (mostly in South and East Asia). In contrast to the large proportion of the global  
191 population experiencing any temperature suitability for ZIKV, we find a total population-at-risk  
192 of 858 million (the vast majority, 767 million, outside LAC) in areas with year-round  
193 temperature suitability for transmission (pixels evaluated as thermally suitable for 12 months –  
194 **Table 2**), highlighting the locations with the most suitable climates where ZIKV importation  
195 could lead to sustained outbreaks.

196 We predict that unmitigated climate change could shift as many as 1.33 billion new  
197 people (1.17 billion outside LAC) into areas with future temperatures suitable for ZIKV  
198 transmission under the worst-case scenario (RCP 8.5; **Table 3**). Five regions with populations of  
199 100 million or more people are projected to experience climate suitability for Zika transmission:  
200 East Africa, High-income North America, East Asia, Western Europe, and North Africa and the  
201 Middle East (with regions designated by the Global Burden of Disease study). A total of 737

202 million people worldwide (635.8 million outside LAC) could face their first exposure to year-  
203 round climate suitability for Zika transmission, mostly in South and East Asia and sub-Saharan  
204 Africa.

205 Net changes in risk are dramatic, largely because there are very few areas where climate  
206 warming will drive future temperatures to become unsuitable (too hot) for at least one month of  
207 the year, but many areas where the climate will become newly suitable (**Figure 2**). For any  
208 transmission risk suitability (**Table 1**), we find a net increase of 2.71 billion (2.52 billion outside  
209 LAC) people at risk in the worst-case scenario (RCP 8.5). Even in the more moderate scenario  
210 for climate change mitigation (RCP 4.5), we project a net increase of 2.50 billion people at risk  
211 (2.33 billion outside LAC; **Table 1**). For people living in areas that experience year-round risk  
212 (**Table 2**), we project for the moderate- and worst-case scenarios a minimum increase of 844.3  
213 million (759.5 million outside LAC) and 915.9 million (808.3 million outside LAC),  
214 respectively. Therefore, the majority of net changes in people at risk for ZIKV-suitable climates  
215 occurs even under the partial mitigation (RCP 4.5) scenario.

216 In the moderate-case scenario (RCP 4.5), the region experiencing the largest increase in  
217 first exposures to any (one or more months) transmission suitability is high income North  
218 America (169.5 million), while under the worst-case scenario (RCP 8.5), the top region is  
219 Eastern sub-Saharan Africa (191.1 million); these regional increases are shown in **Figure 3**.

220

## 221 **Discussion**

222 We present an upper bound on potential future expansion of ZIKV transmission risk based on  
223 thermal suitability in a changing climate. When compared to mapped projections for dengue  
224 transmission suitability in *Aedes aegypti* [24], we see a more constrained range, as the lower

225 temperature limit for ZIKV transmission is higher, precluding cooler regions. This difference in  
226 predicted spatial suitability corroborates findings from distribution modeling approaches to  
227 human case data for dengue and ZIKV [22], underscoring the importance of understanding  
228 transmission biology of specific vector-pathogen pairings. Our mechanistic, trait-based modeling  
229 approach has successfully explained the distribution of several vector-borne illnesses, including  
230 dengue [26], malaria [35], and Ross River fever [36].

231 Our results indicate that warming temperatures will increase thermal suitability for ZIKV  
232 transmission in a significant portion of the world, with over 1.3 billion people likely to be  
233 exposed for the first time to temperature conditions suitable for Zika transmission by the mid-  
234 century in the worst-case scenario. In combination with population change in at-risk areas, this  
235 produces an increase in the population at risk on the order of 2.7 billion people. Whether this risk  
236 leads to actual re-emergence events depends on several limiting factors, most of all the presence  
237 or absence of competent mosquito vectors. The Zika transmission model presented here already  
238 designates some areas as suitable that are outside the range of *Ae. aegypti*, the main vector, or  
239 *Ae. albopictus*, another competent vector of concern. However, both *Ae. aegypti* and *Ae.*  
240 *albopictus* are projected to expand their range to higher latitudes and elevations, with some  
241 indication this has already happened [37,38]. Other studies have also highlighted the potential for  
242 ZIKV to be transmitted by other mosquitoes that are widespread in the rest of the predicted range  
243 [39–41]; each new mosquito vector species and its relative contribution to potential transmission  
244 would introduce subtle differences in the realized climate suitability and effects of climate  
245 change on ZIKV transmission [21,26]. Even where conditions are suitable and mosquito vectors  
246 are present, repeated importation may not lead to establishment [42,43] due to a combination of

247 stochasticity and confounding and interconnected socioenvironmental risk factors (e.g., housing  
248 construction, water storage, mosquito control, and surveillance efforts) [44,45].

249 As the risk areas for ZIKV expand, prioritizing regions for intervention becomes more  
250 difficult. Several major research advances can improve predictions. Testing the competence of  
251 *Aedes* mosquitoes and others to transmit the virus, and identifying regional differences in  
252 competence, are key steps [40,41,46–50]. The impacts of the immune history and genetic risk  
253 factors of human populations are an additional critical component of the system [51].  
254 Seroprevalence studies indicate that another catastrophic Zika epidemic is unlikely in Latin  
255 America and the Caribbean in the near term [11,12], but much less is known about ZIKV  
256 susceptibility in African, Asian, and Pacific Islander populations. Similarly, microcephaly rates  
257 in response to ZIKV infection varied even within the Americas, with the highest rates in Brazil  
258 [52] and lower rates in the Caribbean [53] suggesting significant variation exists across human  
259 populations in the severity of symptoms associated with ZIKV infection. Given the potential for  
260 explosive outbreaks in naïve populations (as happened in the Americas), this is a top priority for  
261 predicting the potential for future outbreaks. The relevance of ZIKV in the coming decades will  
262 be determined by the overall risk of microcephaly, Zika congenital syndrome more broadly, and  
263 Guillain-Barre syndrome—the most severe manifestations of ZIKV infection—which remain  
264 poorly understood.

265 Other features of the abiotic environment, like precipitation, relative humidity, or solar  
266 radiation, also constrain the distribution of vectors and their pathogens, as do biotic interactions  
267 and human-modified features of the landscape. Some of these factors impact transmission in  
268 ways that can be surprising. For example, typically it is assumed that increased precipitation  
269 should increase arboviral transmission, due to increasing potential larval habitat. However,

270 during the 2015-2017 ZIKV outbreak, there was an inverse relationship with precipitation:  
271 drought led to greater transmission because increases in household water storage were associated  
272 with increased Zika cases [44,54] (a pattern also observed in previous arbovirus outbreaks [55]).  
273 Importantly, as mosquitoes are ectothermic, and the effects of precipitation on transmission are  
274 not straightforward, using thermal suitability allows us to set range boundaries on future risk,  
275 both geographically and seasonally. Moreover, in addition to average temperature suitability,  
276 temperature variation can play an important and nonlinear role in transmission, at the level of the  
277 vector [56], potentially increasing environmental suitability for transmission at low mean  
278 temperatures. In addition to this, warming in areas with higher mean temperatures is predicted to  
279 reduce suitability, as conditions pass beyond optimal transmission suitability temperatures. This  
280 can lead to reductions in predicted risk, as seen in the high income Pacific Asia region (Table 1);  
281 this echoes findings for malaria suitability in Africa, seen in Ryan et al [57,58], wherein  
282 Western Africa becomes too hot for malaria suitability, and risk appears to decline rapidly under  
283 climate change scenarios. Given the high upper thermal bounds of transmission suitability of  
284 ZIKV, other direct or indirect impacts of heat on human health are likely to arise, meaning these  
285 predicted declines at high temperatures are not necessarily an optimistic picture. Our  
286 temperature-based approach isolates one of the strongest environmental filters, and avoids  
287 confounding issues of the relationship between precipitation and arboviruses that occurs in the  
288 urban environment, where human behavior and water practices may drive dynamics; put simply,  
289 for urban arboviral transmission, where people are, so is water. Hopefully, the future risk we  
290 project in this study is likely to be substantially constrained by limiting protective factors from  
291 vector-borne disease infection, including socioeconomic, immunological, intervention, and  
292 environmental factors, including the built environment itself.

293           The ZIKV outbreak originating in Brazil in 2015 quickly became a historically  
294 significant global health emergency, highlighting the growing threat of emerging diseases in a  
295 changing world [55]. Even in the moderate-case mitigation scenario (RCP 4.5) considered here,  
296 climate change will substantially increase climate suitability for Zika outbreaks in tropical and  
297 temperate zones around the world. With the economic and social costs of the 2015-2017  
298 pandemic still accumulating, our results suggest another case in which climate change mitigation  
299 is unequivocally necessary for the sake of global health security.

300

### 301 **Author contributions**

302 SJR, CJC, EAM, CCM, LRJ, and BT designed the modeling and analysis frameworks. CJC and  
303 SJR performed the analyses and wrote the first draft. All authors contributed to the writing and  
304 design of the paper and approved the final submission.

305

### 306 **Acknowledgements**

307 Thanks to Fausto Bustos for critical comments on Zika immunology. We would also like to  
308 thank Dr. Melinda Brindley and Leah Demakovsky in the design and execution of the study that  
309 generated the Zika virus data that informed our temperature-dependent  $R_0$  model.

310 Funding: SJR, LRJ, and EAM were supported by NSF EEID (DEB-1518681), EAM, CCM, BT,  
311 MHB and CNN were supported by the National Science Foundation, Grants for Rapid Response  
312 Research (NSF-RAPID 1640780). EAM was additionally supported by the NIH  
313 (1R35GM133439-01), the Terman Award, the Helman Scholarship, and a Stanford University  
314 King Center for Global Development Seed Grant.

315

316 **References**

- 317 1. Sejvar JJ. West Nile virus: an historical overview. *Ochsner J.* 2003;5: 6–10.
- 318 2. Amraoui F, Failloux A-B. Chikungunya: an unexpected emergence in Europe. *Curr Opin*  
319 *Virol.* 2016;21: 146–150.
- 320 3. Chan JF, Choi GK, Yip CC, Cheng VC, Yuen K-Y. Zika fever and congenital Zika  
321 syndrome: an unexpected emerging arboviral disease. *J Infect.* 2016;72: 507–524.
- 322 4. Musso D, Rodriguez-Morales AJ, Levi JE, Cao-Lormeau V-M, Gubler DJ. Unexpected  
323 outbreaks of arbovirus infections: lessons learned from the Pacific and tropical America.  
324 *Lancet Infect Dis.* 2018.
- 325 5. Muñoz ÁG, Thomson MC, Stewart-Ibarra AM, Vecchi GA, Chourio X, Nájera P, et al.  
326 Could the recent Zika epidemic have been predicted? *Front Microbiol.* 2017;8: 1291.
- 327 6. Weaver SC. Prediction and prevention of urban arbovirus epidemics: A challenge for the  
328 global virology community. *Antiviral Res.* 2018;156: 80–84.
- 329 7. O'Reilly K, Lowe R, Edmunds J, Mayaud P, Kucharski A, Eggo RM, et al. Projecting the  
330 end of the Zika virus epidemic in Latin America: a modelling analysis. *bioRxiv.* 2018;  
331 323915.
- 332 8. Control C for D, Prevention (CDC, others. West Nile virus and other arboviral diseases–  
333 United States, 2012. *MMWR Morb Mortal Wkly Rep.* 2013;62: 513.
- 334 9. Waldorf KMA, Olson EM, Nelson BR, Little M-TE, Rajagopal L. The Aftermath of Zika:  
335 Need for Long-Term Monitoring of Exposed Children. *Trends Microbiol.* 2018;26: 729–  
336 732.
- 337 10. Siedner MJ, Ryan ET, Bogoch II. Gone or forgotten? The rise and fall of Zika virus. *Lancet*  
338 *Public Health.* 2018;3: e109–e110.
- 339 11. Netto EM, Moreira-Soto A, Pedroso C, Höser C, Funk S, Kucharski AJ, et al. High Zika  
340 virus seroprevalence in Salvador, northeastern Brazil limits the potential for further  
341 outbreaks. *MBio.* 2017;8: e01390–17.
- 342 12. Zambrana JV, Bustos Carrillo F, Burger-Calderon R, Collado D, Sanchez N, Ojeda S, et al.  
343 Seroprevalence, risk factor, and spatial analyses of Zika virus infection after the 2016  
344 epidemic in Managua, Nicaragua. *Proc Natl Acad Sci.* 2018. doi:10.1073/pnas.1804672115
- 345 13. Manore CA, Ostfeld RS, Agosto FB, Gaff H, LaDeau SL. Defining the risk of Zika and  
346 chikungunya virus transmission in human population centers of the eastern United States.  
347 *PLoS Negl Trop Dis.* 2017;11: e0005255.
- 348 14. Carlson CJ, Dougherty E, Boots M, Getz W, Ryan S. Consensus and conflict among  
349 ecological forecasts of Zika virus outbreaks in the United States. *Sci Rep.* 2018;8: 4921.



- 350 15. Bogoch II, Brady OJ, Kraemer MU, German M, Creatore MI, Brent S, et al. Potential for  
351 Zika virus introduction and transmission in resource-limited countries in Africa and the  
352 Asia-Pacific region: a modelling study. *Lancet Infect Dis.* 2016;16: 1237–1245.
- 353 16. Siraj AS, Perkins TA. Assessing the population at risk of Zika virus in Asia—is the  
354 emergency really over? *BMJ Glob Health.* 2017;2: e000309.
- 355 17. Dhimal M, Dahal S, Dhimal ML, Mishra SR, Karki KB, Aryal KK, et al. Threats of Zika  
356 virus transmission for Asia and its Hindu-Kush Himalayan region. *Infect Dis Poverty.*  
357 2018;7: 40.
- 358 18. Zhu Z, Chan JF-W, Tee K-M, Choi GK-Y, Lau SK-P, Woo PC-Y, et al. Comparative  
359 genomic analysis of pre-epidemic and epidemic Zika virus strains for virological factors  
360 potentially associated with the rapidly expanding epidemic. *Emerg Microbes Infect.* 2016;5:  
361 e22.
- 362 19. Kraemer MU, Brady OJ, Watts A, German M, Hay SI, Khan K, et al. Zika virus  
363 transmission in Angola and the potential for further spread to other African settings. *Trans  
364 R Soc Trop Med Hyg.* 2017;111: 527–529.
- 365 20. Caminade C, Turner J, Metelmann S, Hesson JC, Blagrove MS, Solomon T, et al. Global  
366 risk model for vector-borne transmission of Zika virus reveals the role of El Niño 2015.  
367 *Proc Natl Acad Sci.* 2017;114: 119–124.
- 368 21. Ryan SJ, Carlson CJ, Mordecai EA, Johnson LR. Global expansion and redistribution of  
369 Aedes-borne virus transmission risk with climate change. *bioRxiv.* 2018.  
370 doi:10.1101/172221
- 371 22. Carlson CJ, Dougherty ER, Getz W. An ecological assessment of the pandemic threat of  
372 Zika virus. *PLoS Negl Trop Dis.* 2016;10: e0004968.
- 373 23. Tesla B, Demakovskiy LR, Mordecai EA, Ryan SJ, Bonds MH, Ngonghala CN, et al.  
374 Temperature drives Zika virus transmission: evidence from empirical and mathematical  
375 models. *Proc R Soc Lond B Biol Sci.* 2018;285: 20180795.
- 376 24. Ryan SJ, Carlson CJ, Mordecai EA, Johnson LR. Global expansion and redistribution of  
377 Aedes-borne virus transmission risk with climate change. *PLoS Negl Trop Dis.* 2019;13:  
378 e0007213.
- 379 25. Johnson LR, Ben-Horin T, Lafferty KD, McNally A, Mordecai E, Paaijmans KP, et al.  
380 Understanding uncertainty in temperature effects on vector-borne disease: a Bayesian  
381 approach. *Ecology.* 2015;96: 203–213.
- 382 26. Mordecai E, Cohen J, Evans MV, Gudapati P, Johnson LR, Lippi CA, et al. Detecting the  
383 impact of temperature on transmission of Zika, dengue, and chikungunya using mechanistic  
384 models. *PLoS Negl Trop Dis.* 2017;11: e0005568.

- 385 27. Hijmans RJ, Cameron SE, Parra JL, Jones PG, Jarvis A. Very high resolution interpolated  
386 climate surfaces for global land areas. *Int J Climatol*. 2005;25: 1965–1978.
- 387 28. Hijmans RJ, van Etten J. raster: Geographic analysis and modeling with raster data. 2012.  
388 Available: <http://CRAN.R-project.org/package=raster>
- 389 29. Jones B, O’Neill B. Spatially explicit global population scenarios consistent with the  
390 Shared Socioeconomic Pathways. *Environ Res Lett*. 2016;11: 084003.
- 391 30. Jones B, O’Neill BC. Global Population Projection Grids Based on Shared Socioeconomic  
392 Pathways (SSPs), 2010-2100. NASA Socioeconomic Data and Applications Center  
393 (SEDAC); 2017. Available: <https://doi.org/10.7927/H4RF5S0P>
- 394 31. Riahi K, van Vuuren DP, Kriegler E, Edmonds J, O’Neill BC, Fujimori S, et al. The Shared  
395 Socioeconomic Pathways and their energy, land use, and greenhouse gas emissions  
396 implications: An overview. *Glob Environ Change*. 2017;42: 153–168.  
397 doi:10.1016/j.gloenvcha.2016.05.009
- 398 32. Center for International Earth Science Information Network (CIESIN), Columbia  
399 University. Gridded Population of the World, Version 4 (GPWv4). US NASA  
400 Socioeconomic Data and Applications Center (SEDAC); 2016. Available:  
401 [http://sedac.ciesin.columbia.edu/data/set/gpw-v4-population-count-adjusted-to-2015-](http://sedac.ciesin.columbia.edu/data/set/gpw-v4-population-count-adjusted-to-2015-unwpp-country-totals)  
402 [unwpp-country-totals](http://sedac.ciesin.columbia.edu/data/set/gpw-v4-population-count-adjusted-to-2015-unwpp-country-totals)
- 403 33. Center for International Earth Science Information Network (CIESIN)/Columbia University  
404 IFPRI (IFPRI). Global Rural-Urban Mapping Project, Version 1 (GRUMPv1): Urban  
405 Extents Grid. 2011. Available: [http://sedac.ciesin.columbia.edu/data/set/grump-v1-urban-](http://sedac.ciesin.columbia.edu/data/set/grump-v1-urban-extents)  
406 [extents](http://sedac.ciesin.columbia.edu/data/set/grump-v1-urban-extents).
- 407 34. Moran AE, Oliver JT, Mirzaie M, Forouzanfar MH, Chilov M, Anderson L, et al. Assessing  
408 the Global Burden of Ischemic Heart Disease: Part 1: Methods for a Systematic Review of  
409 the Global Epidemiology of Ischemic Heart Disease in 1990 and 2010. *Glob Heart*. 2012;7:  
410 315–329. doi:10.1016/j.gheart.2012.10.004
- 411 35. Mordecai EA, Paaijmans KP, Johnson LR, Balzer C, Ben-Horin T, Moore E, et al. Optimal  
412 temperature for malaria transmission is dramatically lower than previously predicted. *Ecol*  
413 *Lett*. 2013;16: 22–30.
- 414 36. Shocket MS, Ryan SJ, Mordecai EA. Temperature explains broad patterns of Ross River  
415 virus transmission. Lipsitch M, Baldwin IT, editors. *eLife*. 2018;7: e37762.  
416 doi:10.7554/eLife.37762
- 417 37. Armstrong PM, Andreadis TG, Shepard JJ, Thomas MC. Northern range expansion of the  
418 Asian tiger mosquito (*Aedes albopictus*): Analysis of mosquito data from Connecticut,  
419 USA. *PLoS Negl Trop Dis*. 2017;11: e0005623.

- 420 38. Hernández-Amparan S, Pérez-Santiago G, Correa-Ramírez MM, Reyes-Muñoz JL,  
421 Álvarez-Zagoya R, Ibáñez-Bernal S. First Record of *Aedes* (*Stegomyia*) *aegypti* (L.) at  
422 Durango City, Mexico. *Southwest Entomol.* 2017;42: 789–793.
- 423 39. Evans MV, Dallas TA, Han BA, Murdock CC, Drake JM. Data-driven identification of  
424 potential Zika virus vectors. *eLife.* 2017;6.
- 425 40. Weger-Lucarelli J, Rückert C, Chotiwan N, Nguyen C, Luna SMG, Fauver JR, et al. Vector  
426 competence of American mosquitoes for three strains of Zika virus. *PLoS Negl Trop Dis.*  
427 2016;10: e0005101.
- 428 41. Gendernalik A, Weger-Lucarelli J, Luna SMG, Fauver JR, Rückert C, Murrieta RA, et al.  
429 American *Aedes vexans* mosquitoes are competent vectors of Zika virus. *Am J Trop Med*  
430 *Hyg.* 2017;96: 1338–1340.
- 431 42. Grubaugh ND, Ladner JT, Kraemer MU, Dudas G, Tan AL, Gangavarapu K, et al.  
432 Genomic epidemiology reveals multiple introductions of Zika virus into the United States.  
433 *Nature.* 2017;546: 401.
- 434 43. Fox SJ, Bellan SE, Perkins TA, Johansson MA, Meyers LA. Downgrading disease  
435 transmission risk estimates using terminal importations. *bioRxiv.* 2018; 265942.
- 436 44. Ali S, Gugliemini O, Harber S, Harrison A, Houle L, Ivory J, et al. Environmental and  
437 social change drive the explosive emergence of Zika virus in the Americas. *PLoS Negl*  
438 *Trop Dis.* 2017;11: e0005135.
- 439 45. Christofferson R. Investigating the probability of establishment of Zika virus and detection  
440 through mosquito surveillance under different temperature conditions. *bioRxiv.* 2018;  
441 406116.
- 442 46. Calvez E, O'Connor O, Pol M, Rousset D, Faye O, Richard V, et al. Differential  
443 transmission of Asian and African Zika virus lineages by *Aedes aegypti* from New  
444 Caledonia. *Emerg Microbes Infect.* 2018;7: 159.
- 445 47. Calvez E, Mousson L, Vazeille M, O'Connor O, Cao-Lormeau V-M, Mathieu-Daudé F, et  
446 al. Zika virus outbreak in the Pacific: Vector competence of regional vectors. *PLoS Negl*  
447 *Trop Dis.* 2018;12: e0006637.
- 448 48. Duchemin J-B, Mee PT, Lynch SE, Vedururu R, Trinidad L, Paradkar P. Zika vector  
449 transmission risk in temperate Australia: a vector competence study. *Viol J.* 2017;14: 108.
- 450 49. Boyer S, Calvez E, Chouin-Carneiro T, Diallo D, Failloux A-B. An overview of mosquito  
451 vectors of Zika virus. *Microbes Infect.* 2018.
- 452 50. Kauffman EB, Kramer LD. Zika virus mosquito vectors: competence, biology, and vector  
453 control. *J Infect Dis.* 2017;216: S976–S990.

- 454 51. Rodriguez-Barraquer I, Costa F, Nascimento EJM, Nery N, Castanha PMS, Sacramento  
455 GA, et al. Impact of preexisting dengue immunity on Zika virus emergence in a dengue  
456 endemic region. *Science*. 2019;363: 607. doi:10.1126/science.aav6618
- 457 52. Johansson MA, Mier-y-Teran-Romero L, Reefhuis J, Gilboa SM, Hills SL. Zika and the  
458 risk of microcephaly. *N Engl J Med*. 2016;375: 1–4.
- 459 53. Francis L, Hunte S-A, Valadere AM, Polson-Edwards K, Asin-Oostburg V, Hospedales CJ.  
460 Zika virus outbreak in 19 English-and Dutch-speaking Caribbean countries and territories,  
461 2015-2016. *Int J Infect Dis*. 2018;73: 183.
- 462 54. Burger-Calderon R, Gonzalez K, Ojeda S, Zambrana JV, Sanchez N, Cruz CC, et al. Zika  
463 virus infection in Nicaraguan households. *PLoS Negl Trop Dis*. 2018;12: e0006518.
- 464 55. Shragai T, Tesla B, Murdock C, Harrington LC. Zika and chikungunya: mosquito-borne  
465 viruses in a changing world. *Ann N Y Acad Sci*. 2017;1399: 61–77.
- 466 56. Murdock CC, Paaijmans KP, Cox-Foster D, Read AF, Thomas MB. Rethinking vector  
467 immunology: the role of environmental temperature in shaping resistance. *Nat Rev*  
468 *Microbiol*. 2012;10: 869–876. doi:10.1038/nrmicro2900
- 469 57. Ryan SJ, McNally A, Johnson LR, Mordecai EA, Ben-Horin T, Paaijmans K, et al.  
470 Mapping physiological suitability limits for malaria in Africa under climate change. *Vector-*  
471 *Borne Zoonotic Dis*. 2015;15: 717–725.
- 472 58. Ryan SJ, Lippi CA, Zermoglio F. Shifting transmission risk for malaria in Africa with  
473 climate change: a framework for planning and intervention. *Malar J*. 2020;19: 1–14.
- 474
- 475

476

## Figures and Tables

477 **Figure 1. Current distribution of temperature suitability for Zika transmission, by month.**

478 Results show the number of suitable months per year based on a 97.5% posterior probability for

479  $R_0(T) > 0$  based on the Tesla *et al.* (2018) model of Zika transmission, as a function of mean

480 monthly temperature in each pixel.

481

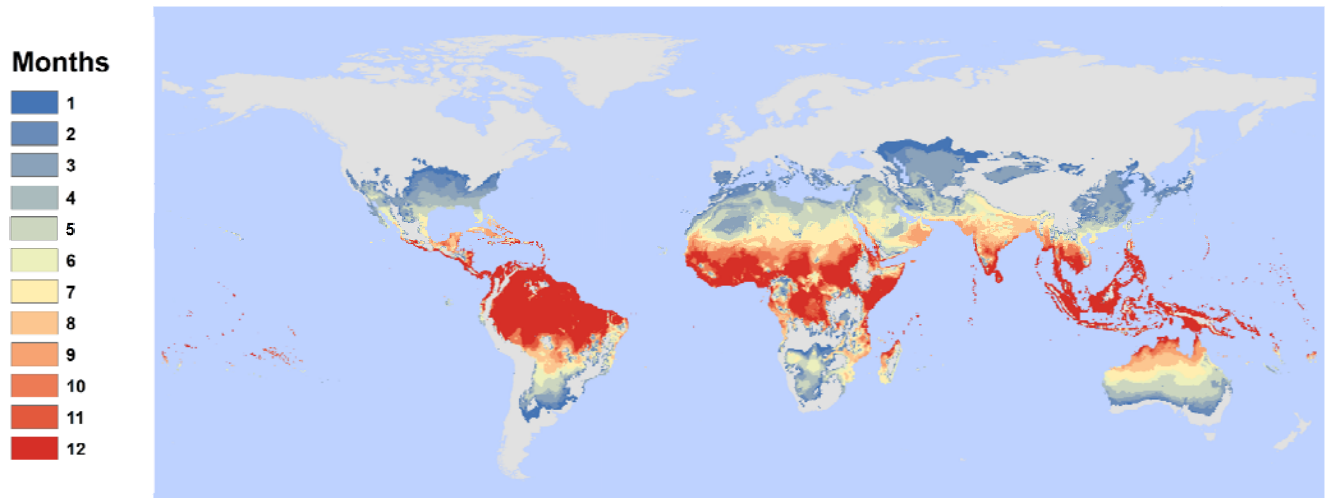

482

483

484

485 **Figure 2. A moderate-case and worst-case scenario for 2050.** The figure shows our model  
486 projecting Zika transmission risk for (A) RCP 4.5 and (B) RCP 8.5 (HadGEM2-ES). Results  
487 show the number of suitable months per year based on a 97.5% posterior probability for  $R_0(T) >$   
488 0 based on the Tesla *et al.* (2018) model of Zika transmission, as a function of mean monthly  
489 temperature in each pixel.  
490

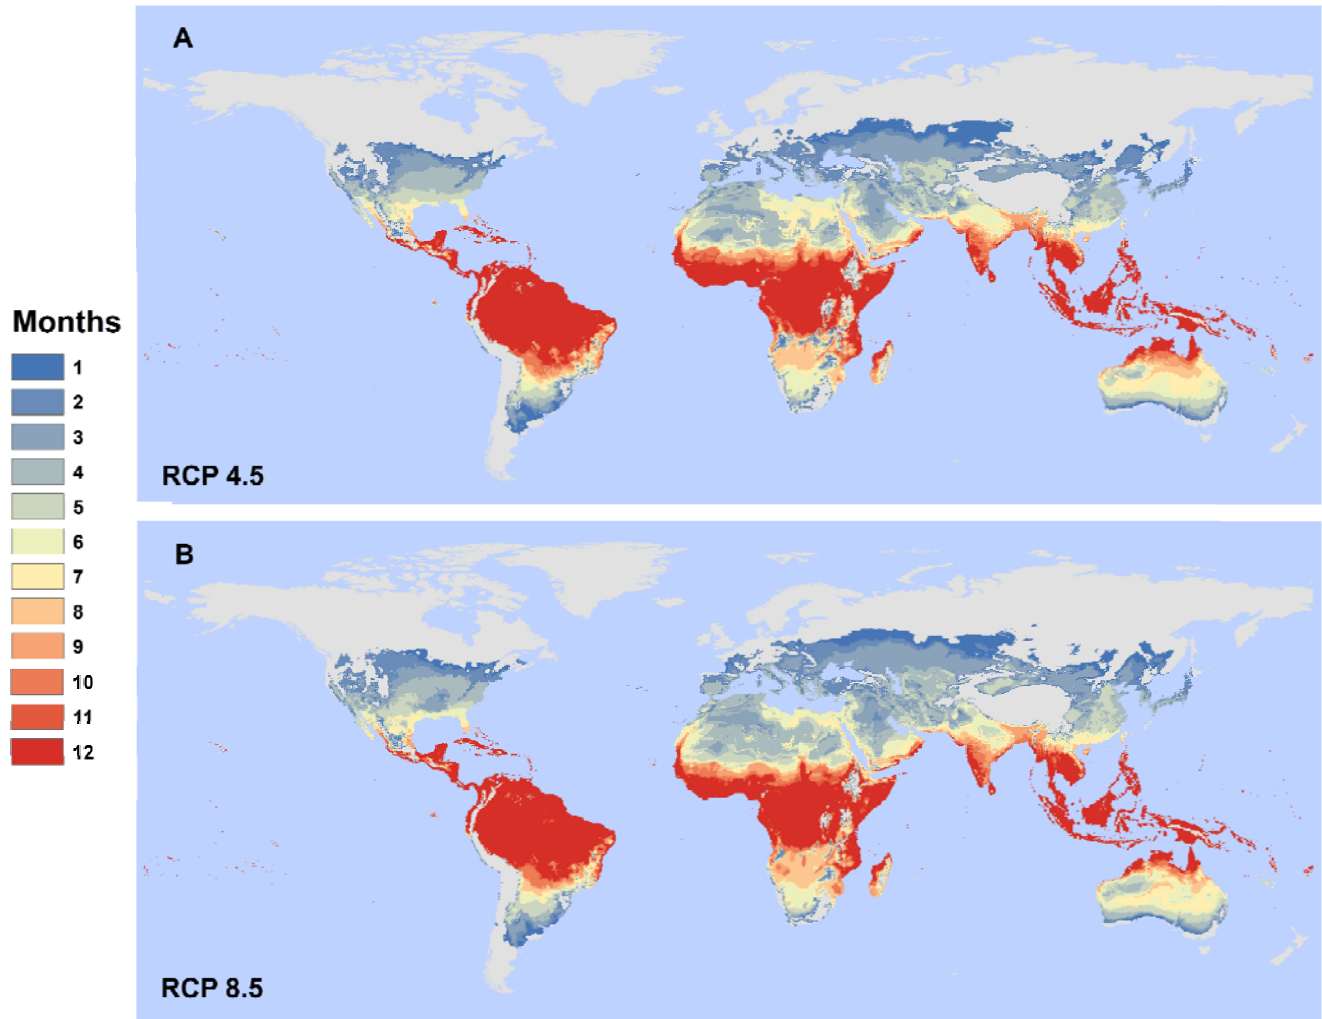

491

492

493

494 **Figure 3. Regional increases in populations at risk for any transmission (one or more**  
495 **months).** Regions are defined according to the Global Burden of Disease (GBD) regions  
496 (detailed in Figure S1), and proportional red circles illustrate the regional populations (in  
497 millions) at risk under (A) RCP 4.5 and (B) RCP 8.5.  
498

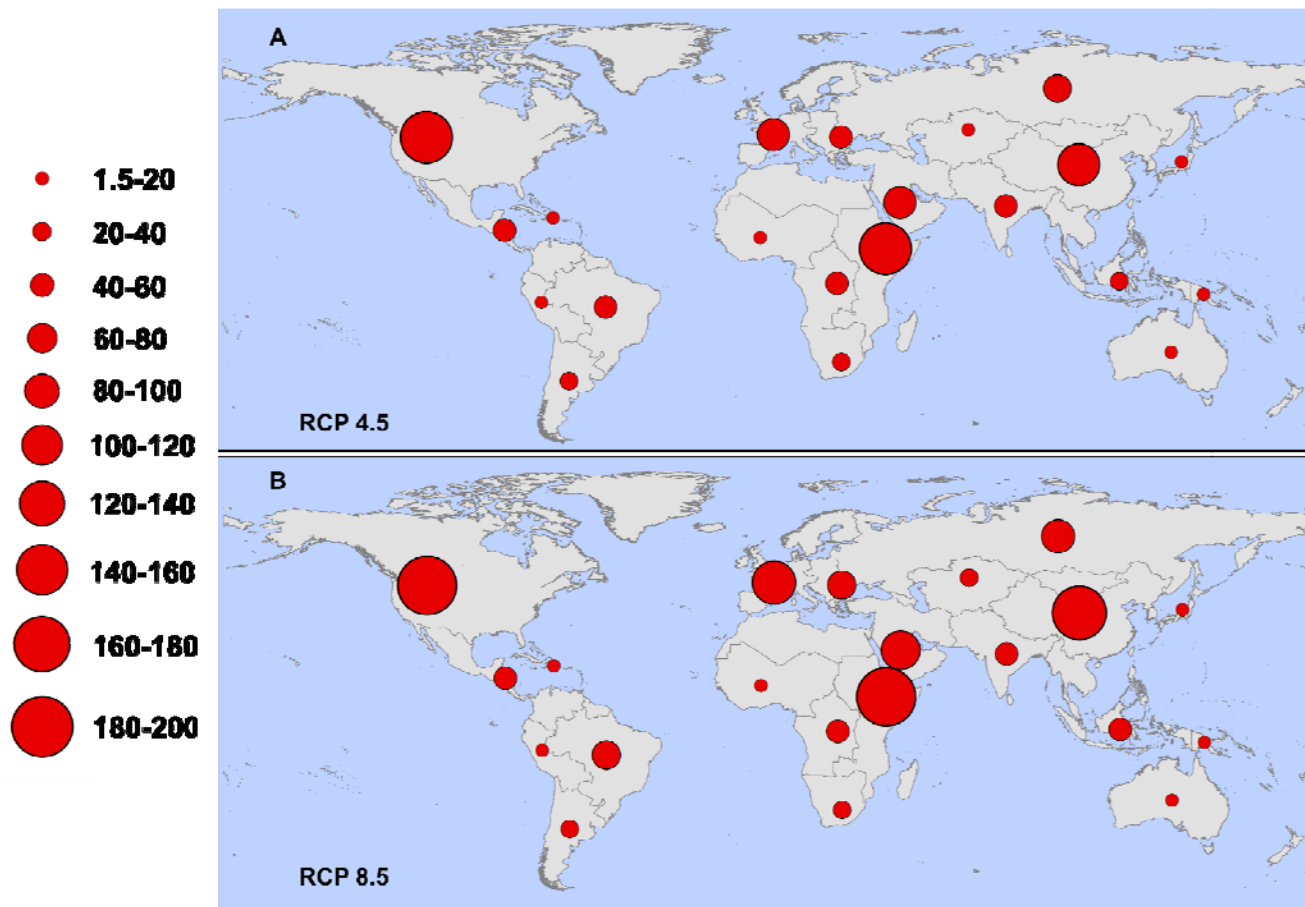

499

500

501

502

503 **Table 1. Current and projected net changes in population at risk for any transmission (one**  
 504 **or more months).** All values are given in millions; future projections are averaged across  
 505 general circulation models (GCMs), broken down by year (2050) and representative  
 506 concentration pathway (RCP: 4.5, 8.5), and are given as net change from a baseline of 2015  
 507 population at risk. Totals are given globally, or across all regions except for Latin America and  
 508 the Caribbean (LAC).

509

510

| Region                        | 2015           | 2050           |                |
|-------------------------------|----------------|----------------|----------------|
|                               |                | RCP 4.5        | RCP 8.5        |
| Asia (Central)                | 56.5           | 20.3           | 24.8           |
| Asia (East)                   | 1,113.5        | 50.3           | 83.8           |
| Asia (High Income Pacific)    | 138.1          | -5.8           | -4.2           |
| Asia (South)                  | 1,621.9        | 639.2          | 644.7          |
| Asia (Southeast)              | 520.7          | 133.7          | 142.5          |
| Australasia                   | 5.3            | 11.4           | 14.5           |
| Caribbean                     | 33.8           | 2.2            | 2.7            |
| Europe (Central)              | 0.6            | 52.2           | 67.7           |
| Europe (Eastern)              | 5.0            | 69.5           | 91.0           |
| Europe (Western)              | 42.9           | 106.9          | 131.2          |
| Latin America (Andean)        | 17.3           | 15.1           | 16.0           |
| Latin America (Central)       | 110.8          | 66.1           | 76.0           |
| Latin America (Southern)      | 15.1           | 30.8           | 31.9           |
| Latin America (Tropical)      | 119.7          | 56.8           | 67.0           |
| North Africa & Middle East    | 359.6          | 262.9          | 275.3          |
| North America (High Income)   | 163.9          | 195.9          | 213.8          |
| Oceania                       | 4.2            | 4.0            | 4.2            |
| Sub-Saharan Africa (Central)  | 86.1           | 100.2          | 106.3          |
| Sub-Saharan Africa (East)     | 179.8          | 315.3          | 344.9          |
| Sub-Saharan Africa (Southern) | 14.3           | 29.4           | 37.3           |
| Sub-Saharan Africa (West)     | 373.8          | 340.4          | 341.0          |
| <b>Total</b>                  | <b>4,928.7</b> | <b>2,496.8</b> | <b>2,712.5</b> |
| <b>Total outside LAC</b>      | <b>4,686.0</b> | <b>2,325.8</b> | <b>2,518.9</b> |



511 **Table 2. Current and projected net changes for population at risk from year-round**  
 512 **transmission risk (12 months).** All values are given in millions; future projections are averaged  
 513 across GCMs, broken down by year (2050) and RCP (4.5, 8.5), and are given as net change from  
 514 current population at risk. Totals are given globally, or across all regions except for Latin  
 515 America and the Caribbean (LAC).  
 516  
 517

| Region                        | 2015         | 2050         |              |
|-------------------------------|--------------|--------------|--------------|
|                               | Baseline     | RCP 4.5      | RCP 8.5      |
| Asia (Central)                | 0            | 0            | 0            |
| Asia (East)                   | 0            | 0            | 0.005        |
| Asia (High Income Pacific)    | 2.7          | 1.5          | 1.4          |
| Asia (South)                  | 104.5        | 111.4        | 107.6        |
| Asia (Southeast)              | 356.7        | 164.0        | 179.0        |
| Australasia                   | 0.1          | 0.1          | 0.1          |
| Caribbean                     | 7.5          | 15.2         | 19.1         |
| Europe (Central)              | 0            | 0            | 0            |
| Europe (Eastern)              | 0            | 0            | 0            |
| Europe (Western)              | 0            | 0            | 0            |
| Latin America (Andean)        | 5.2          | 8.8          | 10.2         |
| Latin America (Central)       | 43.7         | 44.3         | 55.0         |
| Latin America (Southern)      | 0            | 0            | 0            |
| Latin America (Tropical)      | 35.0         | 16.5         | 23.2         |
| North Africa & Middle East    | 5.0          | -1.3         | -0.01        |
| North America (High Income)   | 0            | 0.001        | 0.01         |
| Oceania                       | 2.5          | 3.3          | 3.8          |
| Sub-Saharan Africa (Central)  | 28.0         | 92.0         | 106.6        |
| Sub-Saharan Africa (East)     | 39.7         | 106.8        | 148.3        |
| Sub-Saharan Africa (Southern) | 0            | 0            | 0            |
| Sub-Saharan Africa (West)     | 227.4        | 281.8        | 261.5        |
| <b>Total</b>                  | <b>857.9</b> | <b>844.3</b> | <b>915.9</b> |
| <b>Total outside LAC</b>      | <b>766.5</b> | <b>759.5</b> | <b>808.3</b> |

518 **Table 3. Top 10 regional increases.** Regions, as defined by the Global Burden of Disease study  
 519 (Fig. S1) are ranked based on millions of people exposed for the first time to any (1 or more  
 520 months) transmission risk, or to year round (12 months) transmission risk; parentheses give the  
 521 net change (first exposures minus populations escaping transmission risk). All values are given  
 522 for the worst-case scenario (RCP 8.5). Totals are given globally, or across all regions except for  
 523 Latin America and the Caribbean (LAC).  
 524

| Any transmission risk                |                          | Year-round transmission risk         |                      |
|--------------------------------------|--------------------------|--------------------------------------|----------------------|
| 1. Sub-Saharan Africa (East)         | 191.1 (344.9)            | 1. Sub-Saharan Africa (West)         | 135.1 (261.5)        |
| 2. North America (High Income)       | 187.4 (213.8)            | 2. Sub-Saharan Africa (East)         | 138.6 (148.3)        |
| 3. Asia (East)                       | 172.1 (83.8)             | 3. Asia (South)                      | 127.9 (107.6)        |
| 4. Europe (Western)                  | 123.2 (131.3)            | 4. Asia (Southeast)                  | 108.5 (179.0)        |
| 5. North Africa & the Middle East    | 107.0 (275.3)            | 5. Sub-Saharan Africa (Central)      | 88.8 (106.6)         |
| 6. Europe (Eastern)                  | 91.8 (91.0)              | 6. Latin America (Central)           | 44.3 (54.9)          |
| 7. Europe (Central)                  | 67.7 (67.7)              | 7. Latin America (Tropical)          | 28.2 (23.2)          |
| 8. Latin America (Tropical)          | 60.1 (66.9)              | 8. Caribbean                         | 18.6 (19.1)          |
| 9. Latin America (Central)           | 51.5 (76.0)              | 9. Latin America (Andean)            | 10.0 (10.2)          |
| 10. Sub-Saharan Africa (Central)     | 50.8 (106.3)             | 10. North Africa & the Middle East   | 4.6 (-0.08)          |
| <b>Total</b> (across all 21 regions) | <b>1,326.5 (2,712.5)</b> | <b>Total</b> (across all 21 regions) | <b>736.9 (915.9)</b> |
| <b>Total</b> (outside LAC)           | <b>1,168.5 (2,518.9)</b> | <b>Total</b> (outside LAC)           | <b>635.6 (808.3)</b> |

525

526

527 **Supplementary**

528

529 **S1 Figure. Global health regions.** We adopt the same system as the Global Burden of Disease

530 Study in our regional breakdown.

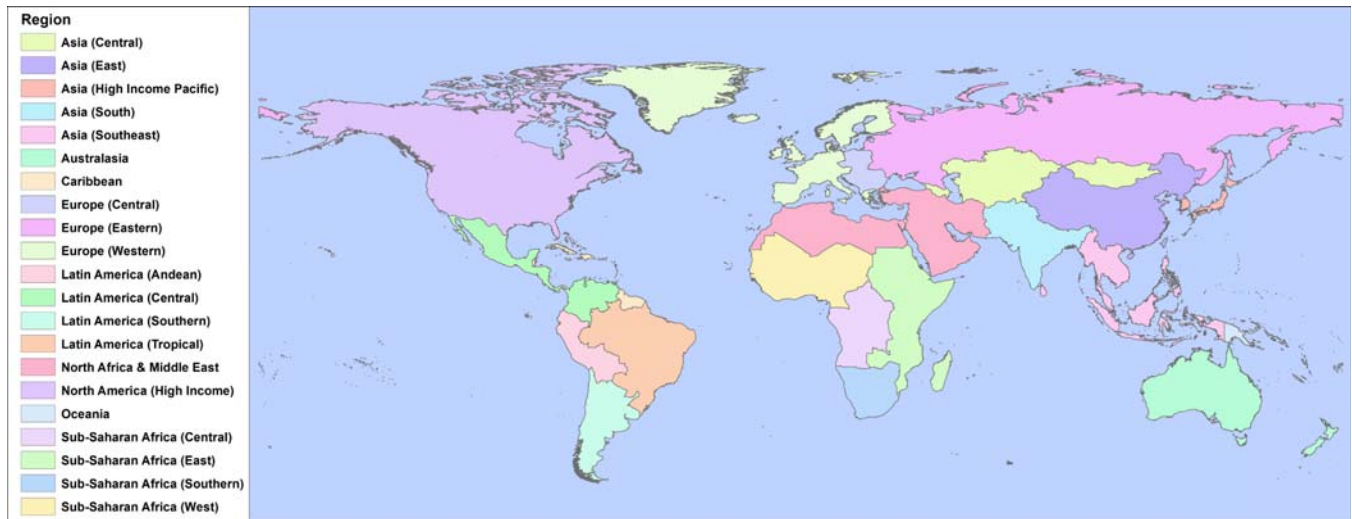

Source: https://medrxiv.org/content/medrxiv/early/2020/06/30/2020.06.29.20142422.full.pdf
